# Supplementary material
Source: Springer Nature journal article supplement (https://www.springermedizin.de/resource/supplementary/12978_2011_119_MOESM1_ESM.pdf/9602894)

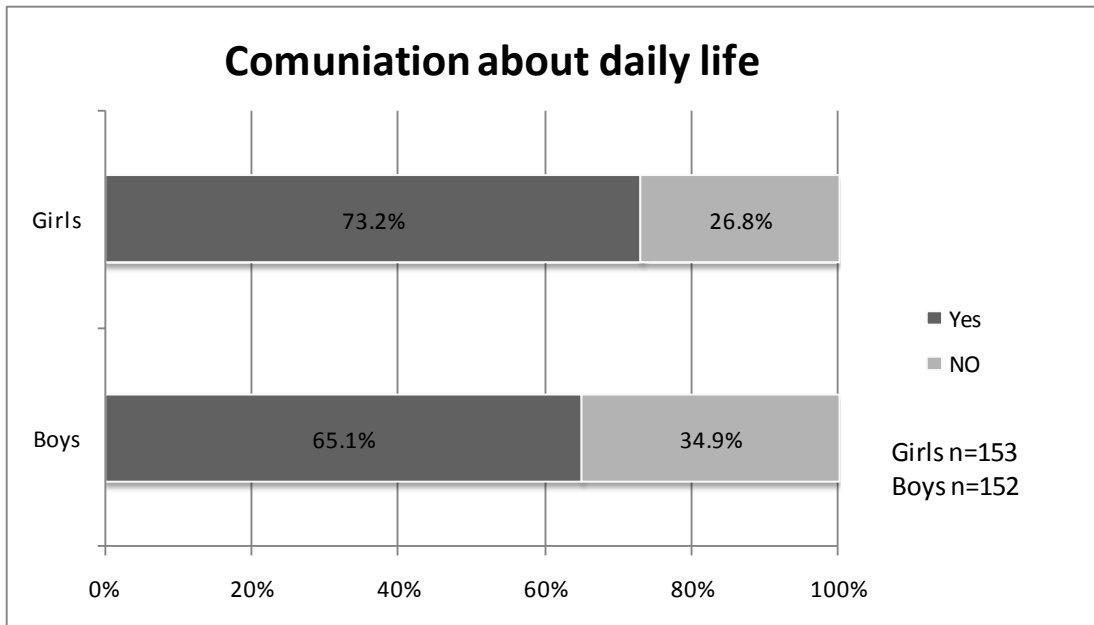

**Figure 1. Communication about daily life**

Supplement: MOESM1 [file 9602894]
